# Supplementary material
Source: PubMed Central journal article supplement (PMC2821796)

**Supplemental Table 1. Incidence of jaw defects following antagonist treatment**

| <b>Structure</b>    | <b>E8.0</b>     | <b>E8.0/E8.5</b> | <b>E8.5</b>       | <b>E8.5/9.0</b> | <b>E9.0</b>   |
|---------------------|-----------------|------------------|-------------------|-----------------|---------------|
| <i>Arch 1</i>       |                 |                  |                   |                 |               |
| mandible            | 0.0 +/- 0.0     | 44.3 +/- 21.2    | 14.0 +/- 6.1      | 91.4 +/- 5.7    | 91.9 +/- 7.8  |
| Meckel's            | 0.0 +/- 0.0     | 28.1 +/- 24.1    | 7.0 +/- 5.2       | 100.0 +/- 0.0   | 89.2 +/- 5.1  |
| Malleus             | 0.0 +/- 0.0     | 55.8 +/- 12.7    | 11.3 +/- 4.5      | 88.6 +/- 11.4   | 86.5 +/- 15.6 |
| Tympanic            | 0.0 +/- 0.0     | 41.2 +/- 19.9    | 17.8 +/- 5.1      | 94.3 +/- 3.5    | 89.2 +/- 3.7  |
| Gonial              | 4.8 +/- 4.8     | 83.3 +/- 11.8    | 48.4 +/- 8.1      | 94.3 +/- 3.5    | 97.3 +/- 4.0  |
| Incus               | 0.0 +/- 0.0     | 49.6 +/- 14.9    | 14.1 +/- 5.6      | 100.0 +/- 0.0   | 97.3 +/- 2.5  |
| Pterygoid           | 4.8 +/- 4.8     | 83.3 +/- 11.8    | 44.3 +/- 10.9     | 100.0 +/- 0.0   | 100.0 +/- 0.0 |
| Alisphenoid         | 0.0 +/- 0.0     | 62.5 +/- 23.9    | 27.3 +/- 9.8      | 100.0 +/- 0.0   | 97.3 +/- 2.5  |
| Squamosal           | 0.0 +/- 0.0     | 46.0 +/- 15.9    | 6.2 +/- 2.2       | 94.6 +/- 3.3    | 75.7 +/- 10.6 |
| Palatine            | 4.8 +/- 4.8     | 69.8 +/- 20.7    | 28.0 +/- 9.5      | 97.8 +/- 2.2    | 83.8 +/- 6.7  |
| Strut               | 9.5 +/- 9.5     | 83.3 +/- 11.8    | 53.3 +/- 9.5      | 100.0 +/- 0.0   | 100.0 +/- 0.0 |
| <i>Arch 2, 3, 4</i> |                 |                  |                   |                 |               |
| hyoid, l. horns     | 0.0 +/- 0.0     | 28.1 +/- 24.1    | 3.6 +/- 3.6       | 88.6 +/- 8.3    | 81.1 +/- 14.6 |
| stapes              | 0.0 +/- 0.0     | 0.0 +/- 0.0      | 0.0 +/- 0.0       | 29.2 +/- 15.1   | 13.5 +/- 4.0  |
| styloid             | 0.0 +/- 0.0     | 14.3 +/- 14.3    | 1.8 +/- 1.8       | 97.1 +/- 2.9    | 75.7 +/- 9.7  |
| hyoid g. horns      | 0.0 +/- 0.0     | 0.0 +/- 0.0      | 5.4 +/- 3.7       | 85.7 +/- 11.1   | 73.0 +/- 16.6 |
| thyroid cartilage   | 0.0 +/- 0.0     | 0.0 +/- 0.0      | 1.8 +/- 1.8       | 41.3 +/- 19.9   | 24.3 +/- 7.4  |
| <br>                |                 |                  |                   |                 |               |
| <b>Structure</b>    | <b>E9.0/9.5</b> | <b>E9.5</b>      | <b>E9.5/E10.0</b> | <b>E10.0</b>    |               |
| <i>Arch 1</i>       |                 |                  |                   |                 |               |
| mandible            | 89.2 +/- 4.5    | 0.0 +/- 0.0      | 0.0 +/- 0.0       | 0.0 +/- 0.0     |               |
| Meckel's            | 79.4 +/- 10.8   | 0.0 +/- 0.0      | 0.0 +/- 0.0       | 0.0 +/- 0.0     |               |
| Malleus             | 88.9 +/- 11.1   | 0.0 +/- 0.0      | 0.0 +/- 0.0       | 0.0 +/- 0.0     |               |
| Tympanic            | 91.9 +/- 2.7    | 1.4 +/- 1.4      | 0.0 +/- 0.0       | 0.0 +/- 0.0     |               |
| Gonial              | 91.7 +/- 5.3    | 0.0 +/- 0.0      | 20.0 +/- 20.0     | 0.0 +/- 0.0     |               |
| Incus               | 83.3 +/- 13.2   | 0.0 +/- 0.0      | 0.0 +/- 0.0       | 0.0 +/- 0.0     |               |
| Pterygoid           | 97.2 +/- 2.8    | 3.8 +/- 2.6      | 13.3 +/- 13.3     | 3.7 +/- 3.7     |               |
| Alisphenoid         | 97.2 +/- 2.8    | 0.0 +/- 0.0      | 0.0 +/- 0.0       | 0.0 +/- 0.0     |               |
| Squamosal           | 79.7 +/- 9.2    | 0.0 +/- 0.0      | 0.0 +/- 0.0       | 0.0 +/- 0.0     |               |
| Palatine            | 80.8 +/- 8.4    | 0.0 +/- 0.0      | 0.0 +/- 0.0       | 0.0 +/- 0.0     |               |
| Strut               | 97.2 +/- 2.8    | 9.0 +/- 4.6      | 37.0 +/- 31.6     | 3.7 +/- 3.7     |               |
| <i>Arch 2, 3, 4</i> |                 |                  |                   |                 |               |
| hyoid, l. horns     | 94.4 +/- 5.6    | 0.0 +/- 0.0      | 0.0 +/- 0.0       | 0.0 +/- 0.0     |               |
| stapes              | 36.4 +/- 5.8    | 0.0 +/- 0.0      | 0.0 +/- 0.0       | 0.0 +/- 0.0     |               |
| styloid             | 91.9 +/- 5.3    | 0.0 +/- 0.0      | 0.0 +/- 0.0       | 0.0 +/- 0.0     |               |
| hyoid g. horns      | 80.6 +/- 19.4   | 2.9 +/- 2.9      | 0.0 +/- 0.0       | 0.0 +/- 0.0     |               |
| thyroid cartilage   | 47.5 +/- 19.6   | 7.9 +/- 2.9      | 0.0 +/- 0.0       | 0.0 +/- 0.0     |               |

The numbers represent the average ratio (in %) of embryos having a specific structural defect within a litter. The error represents the standard deviation from the average of these ratios for each analyzed structure.

# Supplemental Figure 1

A

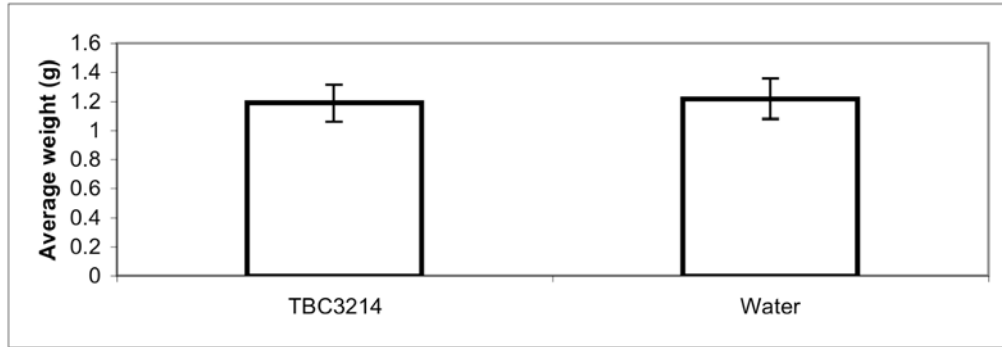

B

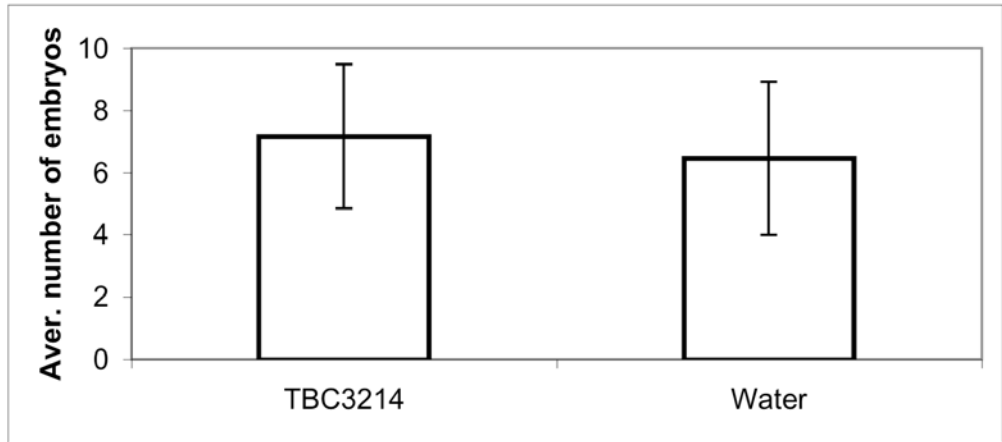

C

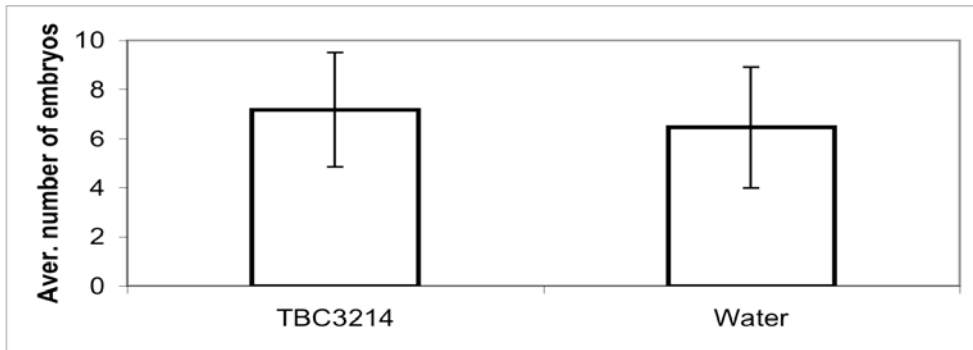

Supplemental Figure 2

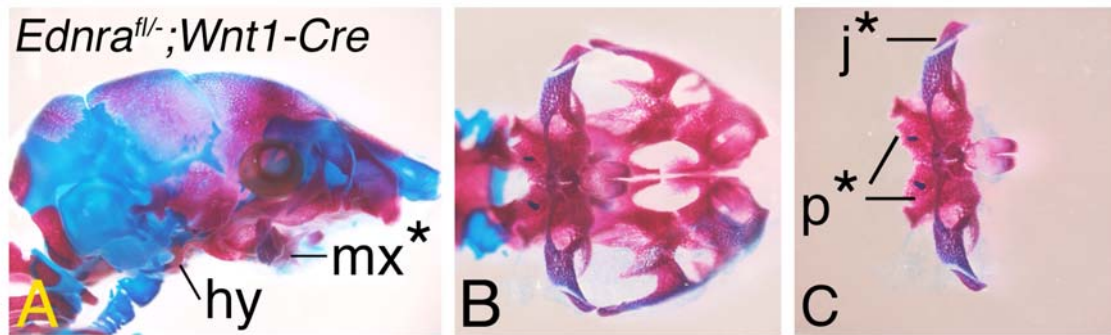

### Supplemental Figure 3

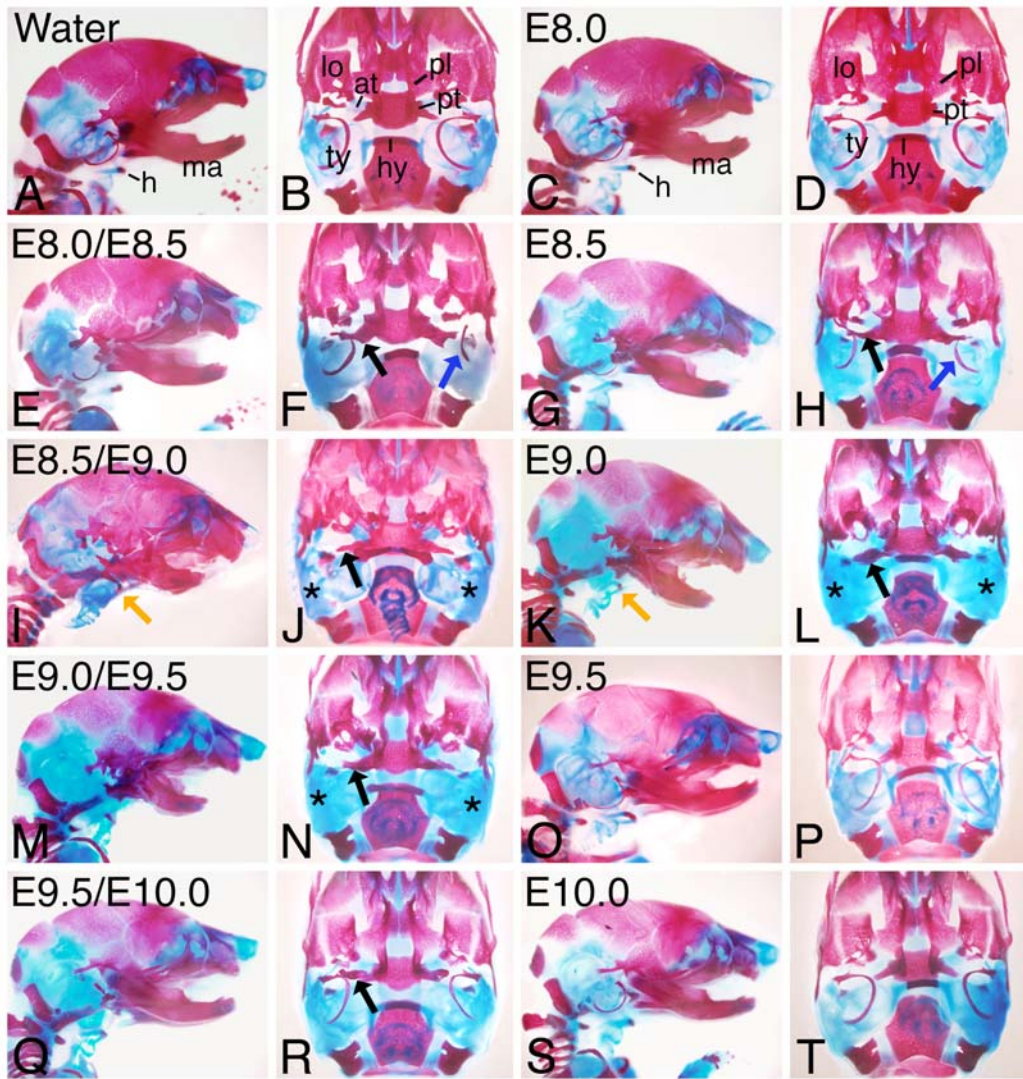

Supplement: NIHMS164308-supplement-01.pdf [file NIHMS164308-supplement-01.pdf]
